# Supplementary material
Source: PubMed Central journal article supplement (PMC6040642)
Supplement: NIHMS979227-supplement-SI.pdf [file NIHMS979227-supplement-SI.pdf]

# **RutA-Catalyzed Oxidative Cleavage of the Uracil Amide Involves Formation of a Flavin-N5-oxide**

Sanjoy Adak and Tadhg P. Begley\*

Department of Chemistry, Texas A&M University, 3255 TAMU, College Station, TX 77843, United States

## **Supporting Information**

### **Table of Contents:**

|                                                                                           |    |
|-------------------------------------------------------------------------------------------|----|
| Materials.....                                                                            | S2 |
| Overexpression and purification of RutA and Fre.....                                      | S2 |
| HPLC parameters and LC-MS parameters.....                                                 | S3 |
| RutA-catalyzed reaction using Fre-NADH as the reducing system.....                        | S4 |
| RutA-catalyzed reaction using photoreduced FMN.....                                       | S4 |
| RutA reaction in the presence of $^{18}\text{O}_2$ using photoreduced FMN.....            | S5 |
| Quantification of FMN-N5-oxide formed in the RutA catalyzed reaction.....                 | S5 |
| General mechanism for flavin-N5-oxide formation involving hydroperoxide intermediate..... | S5 |
| References.....                                                                           | S6 |

## Materials

All chemicals were purchased from Sigma-Aldrich unless mentioned otherwise. LB broth (Lennox) was purchased from EMB Millipore. Chloramphenicol and IPTG were obtained from Lab Scientific Inc. Amicon Ultra centrifugal filter devices (10,000 MWCO) were obtained from Millipore. Histrap column was obtained from GE Healthcare. Econo-Pack 10DG desalting columns were purchased from Bio-Rad. 2.5 L baffled ultra yield flasks for protein overexpression were obtained from Thomson Instrument Company. HPLC and LC-MS solvents were purchased from EMD and were used without further purification. ZORBAX Eclipse XDB-C18 column (15 cm x 4.6 mm, 5  $\mu$ m particles) was purchased from Agilent Technologies. PFP column (150 x 4.6 mm, 2.6  $\mu$ m particles) was purchased from phenomenex.

## Over-expression and purification of RutA and Fre

The RutA gene containing overexpression plasmid (pCA24N)<sup>1</sup> was transformed into *Escherichia coli* BL21 (DE3). For the overexpression of the protein, a starter culture was grown overnight in 15 ml of LB medium containing 20  $\mu$ g/ml of chloramphenicol at 37 °C. 1.5 liter of LB medium (20 g/L) containing 20  $\mu$ g/ml of chloramphenicol, was inoculated with this starter culture. The cells were grown at 37 °C with shaking (220 rpm) until the culture reached an OD<sub>600</sub> of 0.6. The culture was then incubated at 4 °C for ~45min without shaking. Then the culture was induced by adding IPTG to a final concentration of 0.4 mM, the temperature was lowered to 15 °C and the cells were grown with shaking (180 rpm) for a further 15 hours. The cells were then harvested by centrifugation at 10,000g for 10 min at 4 °C and store at -80 °C.

The cell pellet was re-suspended in 30 ml of lysis buffer (50 mM KH<sub>2</sub>PO<sub>4</sub>, 150 mM NaCl, 10 mM imidazole, pH 8.0). Lysozyme (5 mg) was added and the cells were lysed by sonication on ice (Misonix Sonicator 3000, six cycles of 30 s duration during which 1.5 s sonicator pulses at output level 0.8 were followed by 1.5 s pauses). The resulting suspension was centrifuged (18,000 rpm, 30 min) and the supernatant was filtered through a sterile syringe filter (pore size 0.45  $\mu$ m). The clarified supernatant was loaded onto a 5 mL Ni-NTA-affinity column pre-equilibrated with lysis buffer kept at 4 °C. The Ni-NTA-affinity column was then washed with 50 ml wash buffer (50 mM KH<sub>2</sub>PO<sub>4</sub>, 150 mM NaCl, 20 mM imidazole, pH 8.0). The protein was eluted from the column with elution buffer (50 mM KH<sub>2</sub>PO<sub>4</sub>, 150 mM NaCl, 200 mM imidazole, pH 8.0) at 4 °C. The fractions containing protein were pooled and concentrated using YM-10 Amicon ultracentrifugal filters at 5000g to a final volume of 3 mL. The concentrated sample was buffer exchanged, using an Econo-Pac 10DG desalting column, into 100 mM phosphate buffer at pH 7.5 containing 100 mM NaCl and glycerol to a final concentration of 15%. Protein concentration was determined from the absorbance at 280 nm (A<sub>280</sub>) with an Extinction coefficient calculated using the ProtParam tool of the ExPASy proteomics Server ( $\epsilon_{280} = 56380$ ). A typical yield was 20 mg/liter.

The *E. coli* Fre gene<sup>2</sup> was cloned into pTHT vector (derivative of pET28b vector with TEV protease cleavage site after the N-terminal His-tag). The plasmid was transformed into *Escherichia coli* BL21 (DE3). A starter culture was grown overnight in 15 ml of LB medium containing 40  $\mu$ g/ml of Kanamycin at 37 °C. Next, 1.5 L of LB medium containing 40  $\mu$ g/ml of Kanamycin was inoculated with this starting culture. The cells were grown at 37 °C till the OD<sub>600</sub> reached a value of 0.6. The culture was then incubated at 4 °C for 45 min without

shaking and induced with 0.5 mM IPTG followed by incubation at 15 °C for 15 hr with shaking (180 rpm). The cells were then harvested by centrifugation and stored at -80 °C until further use. The purification procedure was same as that for RutA.

### **HPLC parameters**

An Agilent 1260 HPLC equipped with a quaternary pump was used. The system included a diode array UV-Vis detector and products were detected using absorbance at 280 nm, and 450 nm. Analysis was performed either on a ZORBAX Eclipse XDB-C18 column (15 cm x 4.6 mm, 5 µm particles, Agilent Technologies) or PFP column (150 x 4.6 mm, 2.6 µm particles, Kinetex).

HPLC conditions (for C18 column):

A-Water

B-100 mM potassium phosphate buffer, pH 6.6

C-Methanol

HPLC method:

0 min-100% B, 5 min- 10% A 90% B, 12 min-48%A 40%B 12% C, 14 min-50%A 30%B 20% C, 18 min-30% A 10% B 60% C, 20 min-100% B, 25 min-100% B

HPLC conditions (for PFP column):

A-Water

B-100 mM potassium phosphate buffer, pH 6.6

C-Methanol

HPLC method:

0 min-90% A 10% B, 2 min- 90% A 10% B, 22 min-20%A 10%B 70% C, 27 min-20%A 10%B 70% C, 28 min-90% A 10% B, 36 min-90% A 10% B

### **LC-MS parameters**

LC-ESI-TOF-MS was performed using an Agilent 1260 HPLC system which is equipped with a binary pump and a 1200 series diode array detector followed by a MicroToF-Q II mass spectrometer (Bruker Daltonics) using an ESI source either in negative mode or positive mode. Analysis was performed on an LC-18-T column (15 cm x 3 mm, 3 µm particles, Supelco).

LC conditions:

A-5 mM Ammonium acetate buffer, pH 6.6

B-75% Methanol and 25 % Water.

LC method: (for positive and negative mode on MS) 0 min-100% A, 2 min-100% A, 12 min-30% A 70% B, 17 min-30% A 70% B, 18 min-100% A, 30 min-100%A

### RutA-catalyzed reaction using Fre-NADH as reducing system

The RutA catalyzed reaction was performed in 100 mM phosphate buffer, pH 7.5. A 200  $\mu$ L aliquot of the reaction mixture containing RutA (50  $\mu$ M), uracil (500  $\mu$ M), FMN (20  $\mu$ M), *E.coli* Fre (400 nM) and NADH (1 mM) was incubated at RT for 3 hr. The protein was heat-denatured and the resulting solution was filtered using an Amicon Ultra centrifugal filter (10kda cut-off). The samples were analyzed by HPLC (using a C-18 column).

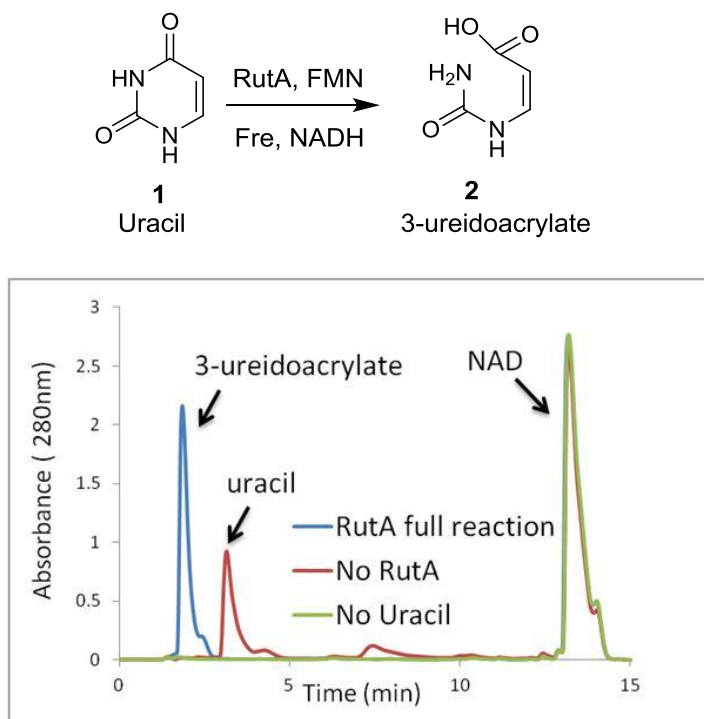

**Figure S1:** HPLC analysis of the RutA reaction mixture (280 nm) showing the formation of 3-ureidoacrylate (2) only when all the components were present.

### RutA-catalyzed reaction using photoreduced FMN

In order to photoreduce FMN, a solution containing FMN (500  $\mu$ M) and EDTA (10 mM) was irradiated, under anaerobic conditions, for 5 min in a glove box with an A21 LED light bulb (100-W, white light). Uracil (100  $\mu$ M) and RutA (100  $\mu$ M) were added to a solution containing photo-reduced FMN (100  $\mu$ M). The resulting mixture was incubated in the glove-box for 0.5 hr. and then exposed to oxygen for an additional 1 hr at 25  $^{\circ}$ C. The protein was heat-denatured and the resulting solution was filtered using an Amicon Ultra centrifugal filter (10kda cut-off). The samples were analyzed by HPLC (using a PFP column) and LC-MS. The results are shown in Figure 4A-E.



## References

- (1) Mukherjee, T.; Zhang, Y.; Abdelwahed, S.; Ealick, S. E.; Begley, T. P. (2010) *J Am Chem Soc* 132, 5550-5551.
- (2) Xun, L.; Sandvik, E. R. (2000) *Appl. Environ. Microbiol* 66, 481-486.
